# Supplementary material
Source: Springer Nature journal article supplement (https://www.springermedizin.de/resource/supplementary/13256_2011_1792_MOESM1_ESM.pdf/9648500)
Supplement: MOESM1 [file 9648500]

Spontaneous  
splenic rupture

```
graph TD; A[Spontaneous splenic rupture] --> B[True spontaneous splenic rupture (7%)]; A --> C[Pathological spontaneous splenic rupture (93%)]; C --> D[Neoplastic (30.3%)]; C --> E[Infective (27.3%)]; C --> F[Inflammatory / Non-infective (20%)]; C --> G[Drug & Iatrogenic (9.2%)]; C --> H[Mechanical (6.8%)];
```

A hierarchical flowchart showing the classification of spontaneous splenic rupture. The root node is 'Spontaneous splenic rupture' (orange box). It branches into 'True spontaneous splenic rupture (7%)' (purple box) and 'Pathological spontaneous splenic rupture (93%)' (teal box). The 'Pathological spontaneous splenic rupture' node further branches into five sub-categories: 'Neoplastic (30.3%)', 'Infective (27.3%)', 'Inflammatory / Non-infective (20%)', 'Drug & Iatrogenic (9.2%)', and 'Mechanical (6.8%)' (all in teal boxes).

True spontaneous  
splenic rupture (7%)

Pathological spontaneous  
splenic rupture (93%)

Neoplastic  
(30.3%)

Infective  
(27.3%)

Inflammatory / Non-  
infective (20%)

Drug & Iatrogenic  
(9.2%)

Mechanical  
(6.8%)
